# Supplementary material for: The effect of amino substituents on the interactions of quinazolone derivatives with c-KIT G-quadruplex: insight from molecular dynamics simulation study for rational design of ligands
Source: Royal Society of Chemistry journal article supplement (doi:10.1039/c5ra13615f), 2015-01-01
Supplement: c5ra13615f1.pdf [file c5ra13615f1.pdf]

## **The Effect of Amino Substituents on the Interactions of Quinazolone Derivatives with *c*-KIT G-Quadruplex: Insight from Molecular Dynamics Simulation Study to Rational Design of Ligands**

Kiana Gholamjani Moghaddam<sup>a</sup> and Seyed Majid Hashemianzadeh<sup>a\*</sup>

<sup>a</sup> Molecular Simulation Research Laboratory, Department of Chemistry, Iran University of Science & Technology, Tehran, Iran

\*Corresponding Author

Tel: +982177240287

Fax: +982177491204

E-mail: hashemianzadeh@iust.ac.ir, hashemianzadeh@gmail.com

### Supplementary Information

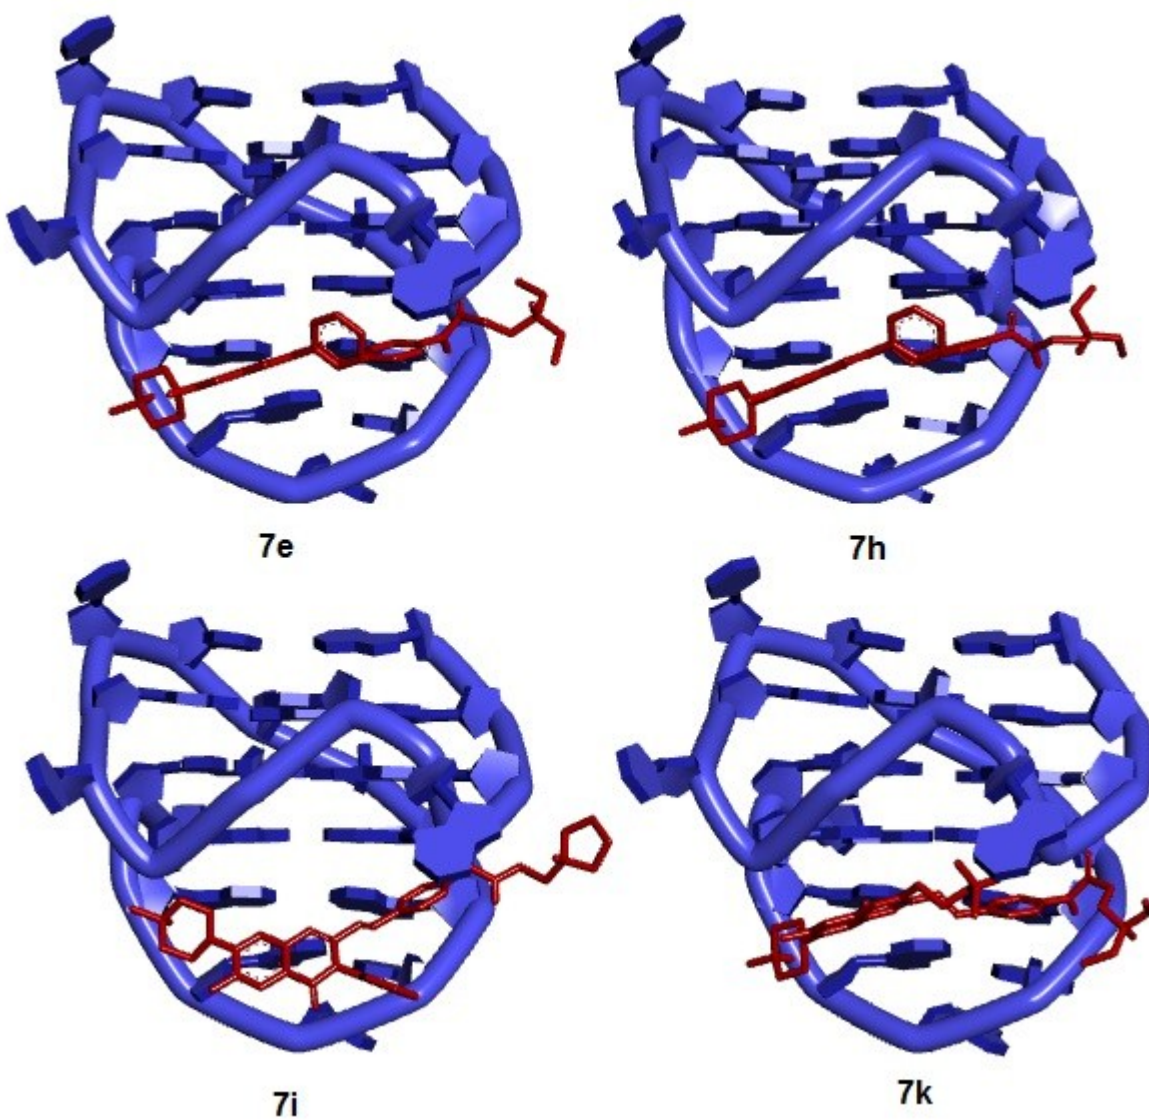

**Fig. S1.** Structures of ligands and *c-KIT* G-quadruplex after molecular docking are shown in red and blue, respectively.

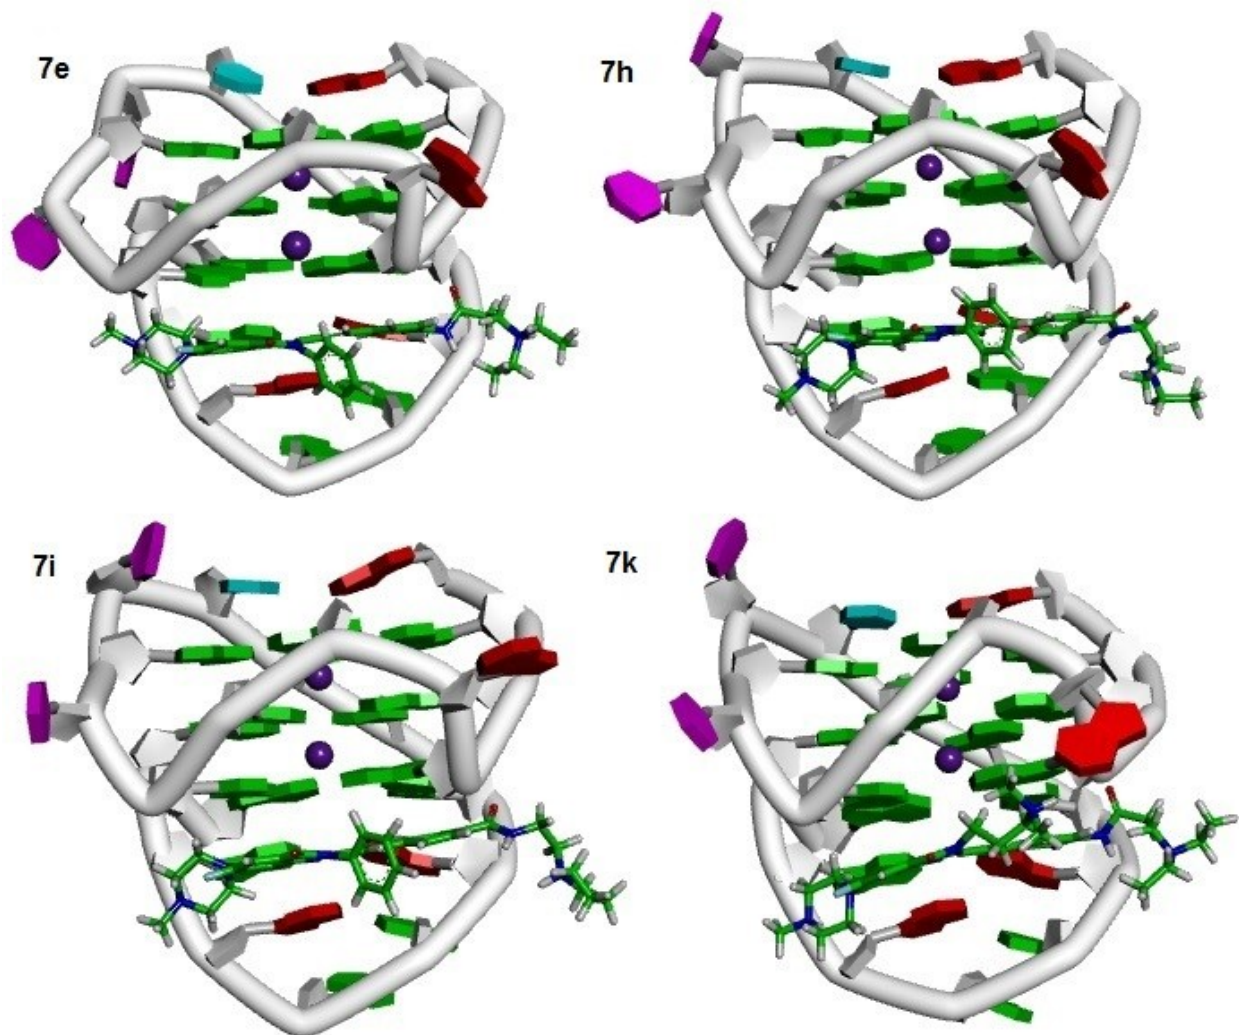

**Fig. S2.** Final MD structures of the G-quadruplex-ligand complexes after 50 ns simulations. The  $K^+$  ions in the middle of G-quartets are shown as purple spheres.

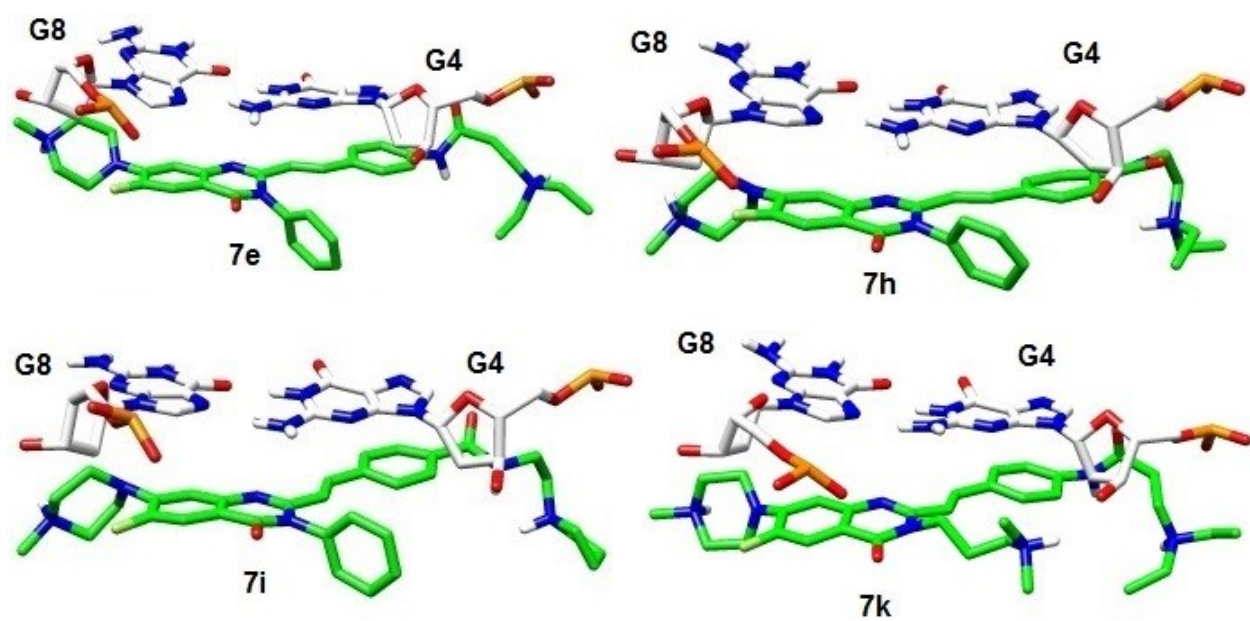

**Fig. S3.** Stacking interactions between ligands and *c-KIT* G-quadruplex.
